# Supplementary material for: Coral reef islands can accrete vertically in response to sea level rise
Source: PubMed Central journal article supplement (PMC7286686; doi:10.1126/sciadv.aay3656), 2020-06-10
Supplement: aay3656_SM.pdf [file aay3656_SM.pdf]

[advances.sciencemag.org/cgi/content/full/6/24/eaay3656/DC1](https://advances.sciencemag.org/cgi/content/full/6/24/eaay3656/DC1)

## Supplementary Materials for

### **Coral reef islands can accrete vertically in response to sea level rise**

Gerd Masselink\*, Eddie Beetham, Paul Kench

\*Corresponding author. Email: [gerd.masselink@plymouth.ac.uk](mailto:gerd.masselink@plymouth.ac.uk)

Published 10 June 2020, *Sci. Adv.* **6**, eaay3656 (2020)  
DOI: 10.1126/sciadv.aay3656

**This PDF file includes:**

Figs. S1 and S2  
Tables S1 to S4

## SUPPLEMENTARY MATERIALS

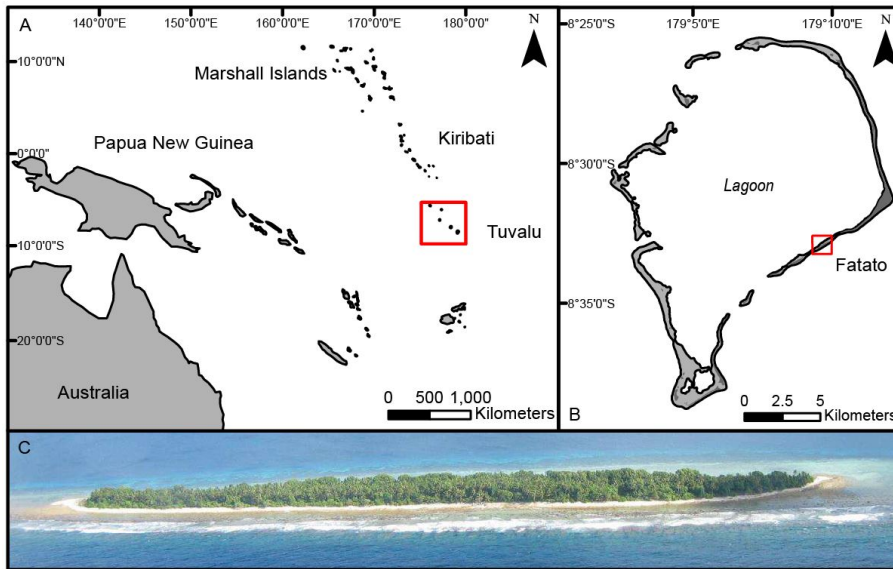

**Figure S1. Environmental setting of Fatato Island.** (a) Location of Tuvalu within the Pacific. (b) Location of Fatato Island, Funafuti atoll, Tuvalu. (c) Aerial photograph of Fatato Island taken by Paul Kench, February 2013.

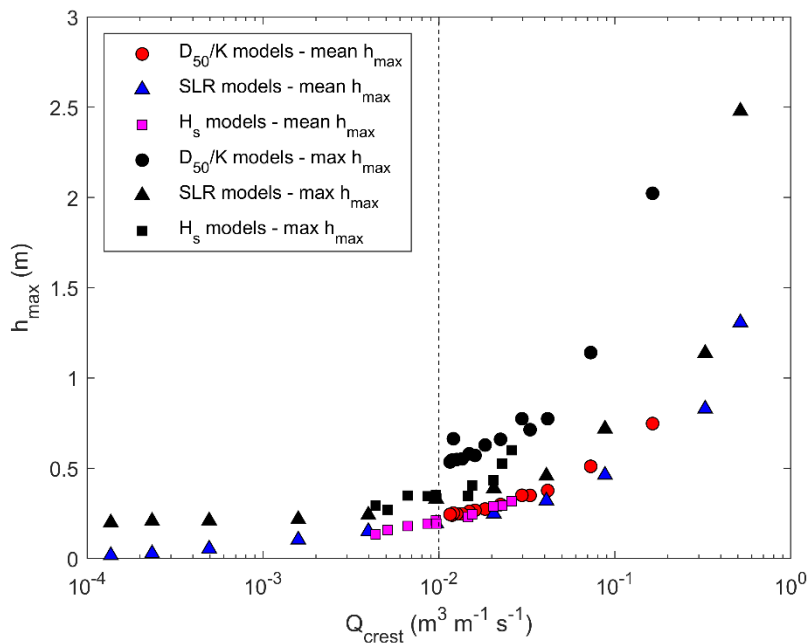

**Figure S2. Relation between crest discharge and water depth during overwash.** Comparison between mean overwash discharge across the island ( $Q_{crest}$ ) and the maximum water depth during overwash at the island crest location ( $h_{max}$ ) for the 3-hr numerical simulation shown in Figure 2. Two estimates for  $h_{max}$  are plotted: the maximum  $h_{max}$  attained over the 3-hr simulation period (usually attained at the end of the overwash simulations and at the start of the overtopping simulations) and the mean  $h_{max}$  computed as the average of 5-min  $h_{max}$  values.

**Table S1. Summary of island morphology and overwash characteristics at the end of each SLR simulation.**

$Z_{crest}$  = crest elevation;  $\Delta z_{crest}$  = difference between initial and final island crest elevation;  $\Delta x_{crest}$  = difference between initial and final island crest position;  $\Delta freeboard$  = reduction in freeboard (elevation difference between crest and sea level) relative to the start of the simulation; and  $Q_{crest}$  = overtopping discharge at the crest location. Hourly mean and maximum values for  $Q_{crest}$  are calculated for the final hour of each simulation at SLR = 0.75 m.

| Scenario | $Z_{crest}$<br>(m) | $\Delta z_{crest}$<br>(m) | $\Delta x_{crest}$<br>(m) | $\Delta freeboard$<br>(m) | Mean $Q_{crest}$<br>( $m^3 m^{-1} s^{-1}$ ) | Max $Q_{crest}$<br>( $m^3 m^{-1} s^{-1}$ ) |
|----------|--------------------|---------------------------|---------------------------|---------------------------|---------------------------------------------|--------------------------------------------|
| XB5      | 4.929              | 0.284                     | 9.0                       | -0.466                    | 0.0025                                      | 0.4674                                     |
| XB6      | 4.985              | 0.340                     | 11.0                      | -0.410                    | 0.0018                                      | 0.4185                                     |
| XB7      | 5.321              | 0.676                     | 16.4                      | -0.074                    | 0.0003                                      | 0.2238                                     |

**Table S2. Hydrodynamic parameters used within the Test Series A-C.**  $Test$  = test series;  $H_s$  = significant wave height;  $T_p$  = peak wave period; and  $h_{reef}$  = water level on reef. The prototype values are given in brackets. The results shown in Fig. 1c, d, e relate to the mid-tide run with extreme wave conditions with a short wave period.

| Test Series          | $H_s$ (m)        |              |                | $T_p$ (s)    |             | $h_{reef}$ (m) |
|----------------------|------------------|--------------|----------------|--------------|-------------|----------------|
|                      | <i>Energetic</i> | <i>Storm</i> | <i>Extreme</i> | <i>Short</i> | <i>Long</i> |                |
| <b>A (low tide)</b>  | 0.04 (2)         | 0.06 (3)     | 0.08 (4)       | 1.4 (9.9)    | 2.3 (16)    | 0(0)           |
| <b>B (mid-tide)</b>  | 0.04 (2)         | 0.06 (3)     | 0.08 (4)       | 1.4 (9.9)    | 2.3 (16)    | 0.02(1)        |
| <b>C (high tide)</b> | 0.04 (2)         | 0.06 (3)     | 0.08 (4)       | 1.4 (9.9)    | 2.3 (16)    | 0.04(2)        |

**Table S3. Hydrodynamic parameters used in physical flume experiments.**  $Z_{start}$  = profile at start of the simulation;  $H_s$  = significant wave height;  $T_p$  = wave period;  $h_{reef}$  = water level on reef; and  $T_{test}$  = test time. Prototype values are given in brackets.

| Test series | $Z_{start}$   | $H_s$ (m) | $T_p$ (s) | $h_{reef}$ (m) | SLR (m)    | $D_{50}$ (mm) | $T_{test}$ (hrs) |
|-------------|---------------|-----------|-----------|----------------|------------|---------------|------------------|
| <b>D1</b>   | Actual (2013) | 0.08 (4)  | 1.4 (9.9) | 0.04 (2)       | 0          | 0.3 (15)      | 1.5 (10.6)       |
| <b>D2</b>   | After D1      | 0.08 (4)  | 1.4 (9.9) | 0.05 (2.5)     | 0.01 (0.5) | 0.3 (15)      | 1.5 (10.6)       |
| <b>D3</b>   | After D2      | 0.08 (4)  | 1.4 (9.9) | 0.06 (3)       | 0.02 (1)   | 0.3 (15)      | 7 (49.5)         |

**Table S4. Relation between sediment size  $D_{50}$  and hydraulic conductivity  $K$  used in numerical test series XB2.**

| $D_{50}$ (mm)       | 2 | 3 | 4 | 5 | 6  | 7  | 8  | 9  | 10 | 11 | 12 | 13 | 14 | 15  |
|---------------------|---|---|---|---|----|----|----|----|----|----|----|----|----|-----|
| $K$ ( $mm s^{-1}$ ) | 2 | 4 | 6 | 8 | 10 | 20 | 30 | 40 | 50 | 60 | 70 | 80 | 90 | 100 |
